# Supplementary material for: TNF-α Inhibitors in Combination with MTX Reduce Circulating Levels of Heparan Sulfate/Heparin and Endothelial Dysfunction Biomarkers (sVCAM-1, MCP-1, MMP-9 and ADMA) in Women with Rheumatoid Arthritis
Source: MDPI journal article supplement (doi:10.3390/jcm11144213), 2022-07-20
Supplement: s1 [file s1]

**Table S1.** Changes in biochemical, clinical and functional markers in women with RA without responding to or loss of response to TNFaI therapy over time.

| No Of Patients                                                              | Parameter                | RA Patients With Primary Fail To Respond To TNFaI Therapy (n = 2) |                              |                           |                            |
|-----------------------------------------------------------------------------|--------------------------|-------------------------------------------------------------------|------------------------------|---------------------------|----------------------------|
|                                                                             |                          | Before TNFaI Therapy                                              | After Starting TNFaI Therapy |                           |                            |
|                                                                             |                          | T <sub>0</sub>                                                    | T <sub>1</sub> (3 Months)    | T <sub>2</sub> (9 Months) | T <sub>3</sub> (15 Months) |
| <b>Patient 1</b>                                                            | Age [years]              | 45                                                                |                              |                           |                            |
|                                                                             | Disease duration [years] | 15                                                                |                              |                           |                            |
|                                                                             | SW, n                    | 12                                                                | 10                           | -                         | -                          |
|                                                                             | TEN, n                   | 14                                                                | 28                           | -                         | -                          |
|                                                                             | VAS, [0-100 mm]          | 80                                                                | 80                           | -                         | -                          |
|                                                                             | DAS28-ESR                | 6.36                                                              | 7.40                         | -                         | -                          |
|                                                                             | ESR [mm/h]               | 22                                                                | 32                           | -                         | -                          |
|                                                                             | CRP [mg/l]               | 4                                                                 | 3                            | -                         | -                          |
|                                                                             | TNFaI therapy            | ADA (Humira)                                                      |                              |                           |                            |
| <b>Patient 2</b>                                                            | Age [years]              | 32                                                                |                              |                           |                            |
|                                                                             | Disease duration [years] | 9                                                                 |                              |                           |                            |
|                                                                             | SW, n                    | 9                                                                 | 5                            | -                         | -                          |
|                                                                             | TEN, n                   | 11                                                                | 15                           | -                         | -                          |
|                                                                             | VAS, [0-100 mm]          | 70                                                                | 90                           | -                         | -                          |
|                                                                             | DAS28-ESR                | 5.22                                                              | 6.09                         | -                         | -                          |
|                                                                             | ESR [mm/h]               | 9                                                                 | 18                           | -                         | -                          |
|                                                                             | CRP [mg/l]               | 2                                                                 | 3                            | -                         | -                          |
|                                                                             | TNFaI therapy            | ADA (Humira)                                                      |                              |                           |                            |
| <b>RA Patients With Secondary Loss Of Response To TNFaI Therapy (n = 3)</b> |                          |                                                                   |                              |                           |                            |
| <b>Patient 3</b>                                                            | Age [years]              | 62                                                                |                              |                           |                            |
|                                                                             | Disease duration [years] | 5                                                                 |                              |                           |                            |
|                                                                             | SW, n                    | 10                                                                | 3                            | 11                        | -                          |
|                                                                             | TEN, n                   | 14                                                                | 8                            | 13                        | -                          |
|                                                                             | VAS, [0-100 mm]          | 60                                                                | 45                           | 65                        | -                          |
|                                                                             | DAS28-ESR                | 6.68                                                              | 4.38                         | 6.03                      | -                          |
|                                                                             | ESR [mm/h]               | 59                                                                | 11                           | 22                        | -                          |
|                                                                             | CRP [mg/l]               | 15                                                                | 11                           | 10                        | -                          |
|                                                                             | TNFaI therapy            | ETA (Enbrel)                                                      |                              |                           |                            |
| <b>Patient 4</b>                                                            | Age [years]              | 60                                                                |                              |                           | -                          |
|                                                                             | Disease duration [years] | 21                                                                |                              |                           | -                          |
|                                                                             | SW, n                    | 6                                                                 | 3                            | 10                        | -                          |
|                                                                             | TEN, n                   | 9                                                                 | 7                            | 10                        | -                          |
|                                                                             | VAS, [0-100 mm]          | 90                                                                | 50                           | 50                        | -                          |
|                                                                             | DAS28-ESR                | 6.47                                                              | 3.92                         | 5.96                      | -                          |
|                                                                             | ESR [mm/h]               | 57                                                                | 6                            | 41                        | -                          |
|                                                                             | CRP [mg/l]               | 30                                                                | 2                            | 48                        | -                          |
|                                                                             | TNFaI therapy            | ETA (Enbrel)                                                      |                              |                           |                            |
| <b>Patient 5</b>                                                            | Age [years]              | 52                                                                |                              |                           | -                          |
|                                                                             | Disease duration [years] | 19                                                                |                              |                           | -                          |
|                                                                             | SW, n                    | 10                                                                | 1                            | 8                         | -                          |
|                                                                             | TEN, n                   | 10                                                                | 0                            | 12                        | -                          |
|                                                                             | VAS, [0-100 mm]          | 80                                                                | 5                            | 70                        | -                          |
|                                                                             | DAS28-ESR                | 5.73                                                              | 1.48                         | 5.57                      | -                          |
|                                                                             | ESR [mm/h]               | 16                                                                | 5                            | 14                        | -                          |
|                                                                             | CRP [mg/l]               | 40                                                                | 2                            | 2                         | -                          |
|                                                                             | TNFaI therapy            | ADA (Humira)                                                      |                              |                           |                            |

CRP, C-reactive protein; DAS28-ESR, 28 joint disease activity score based on erythrocyte sedimentation rate; ESR, erythrocyte sedimentation rate; RA, rheumatoid arthritis; SW, swollen joint count; TEN, tender joint count; TNFaI, tumor necrosis factor- $\alpha$  inhibitors; VAS, visual analogue scale.
